# Supplementary material for: Codon usage pattern and its influencing factors in different genomes of hepadnaviruses
Source: Springer Nature journal article supplement (doi:10.1007/s00705-020-04533-6), 2020-02-08
Supplement: MOESM1 [file 17662302]

**S1: Accession number and genomes of hepadnaviridae**

| **Sl. no.** | **Genomes** | **Length** | **Hosts** |
| --- | --- | --- | --- |
| 1 | Woodchuck hepatitis virus | 3323 nt* | Vertebrates |
| 2 | Ground squirrel hepatitis virus | 3311 nt | Vertebrates |
| 3 | Duck hepatitis B virus | 3027 nt | Vertebrates |
| 4 | Long-fingered bat hepatitis B virus isolate 776 | 3230 nt | Vertebrates |
| 5 | Tinamou hepatitis B virus isolate 160050 | 3024 nt | Vertebrates |
| 6 | Tibetan frog hepadnavirus isolate 243398 | 3138 nt | Vertebrates |
| 7 | Woolly monkey hepatitis B virus clone WMHBV-2 | 3179 nt | Vertebrates |
| 8 | White sucker hepadnavirus isolate RR173 | 3542 nt | Vertebrates |
| 9 | Tent-making bat hepatitis B virus isolate TBHBV_Pan372_Uro_bil_PAN_2010 | 3149 nt | Vertebrates |
| 10 | Horseshoe bat hepatitis B virus isolate HBHBV_GB09-403_Rhi_alc_GAB_2009 | 3377 nt | Vertebrates |
| 11 | Roundleaf bat hepatitis B virus isolate RBHBV_GB09-256_Hip_rub_GAB_2009 | 3368 nt | Vertebrates |
| 12 | Parrot hepatitis B virus | 3048 nt | Vertebrates |
| 13 | Snow goose hepatitis B virus | 3024 nt | Vertebrates |
| 14 | Ross's goose hepatitis B virus | 3018 nt | Vertebrates |
| 15 | Sheldgoose hepatitis B virus | 3051 nt | Vertebrates |
| 16 | Heron hepatitis B virus | 3027 nt | Vertebrates |
| 17 | Hepatitis B virus (strain ayw) | 3182 nt | Vertebrates, Human |

*nt- Nucleotide

**S2: Preferred codon for each amino acid in genes of hepadnaviridae**

| Amino acid | Codon | Mean | Preferred codon | Amino acid | Codon | Mean | Preferred codon |
| --- | --- | --- | --- | --- | --- | --- | --- |
| Phenylalanine | TTT | 1.13 | TTT |  | GCC | 1.03 |  |
|  | TTC | 0.84 |  |  | GCA | 1.09 |  |
| Leucine | TTA | 1.24 | TTA |  | GCG | 0.30 |  |
|  | TTG | 1.09 |  | Tyrosine | TAT | 1.31 | TAT |
|  | CTT | 1.04 |  |  | TAC | 0.64 |  |
|  | CTC | 0.99 |  | Histidine | CAT | 1.08 | CAT |
|  | CTA | 0.64 |  |  | CAC | 0.88 |  |
|  | CTG | 0.95 |  | Glutamine | CAA | 1.35 | CAA |
| Isoleucine | ATT | 1.21 | ATT |  | CAG | 0.65 |  |
|  | ATC | 0.88 |  | Asparagine | AAT | 1.12 | AAT |
|  | ATA | 0.79 |  |  | AAC | 0.86 |  |
| Valine | GTT | 1.02 | GTC | Lysine | AAA | 1.24 | AAA |
|  | GTC | 1.05 |  |  | AAG | 0.73 |  |
|  | GTA | 0.93 |  | Aspartic acid | GAT | 1.03 | GAT |
|  | GTG | 0.98 |  |  | GAC | 0.94 |  |
| Serine | TCT | 1.83 | TCT | Glutamic acid | GAA | 1.17 | GAA |
|  | TCC | 1.20 |  |  | GAG | 0.74 |  |
|  | TCA | 1.26 |  | Cysteine | TGT | 0.78 | TGC |
|  | TCG | 0.58 |  |  | TGC | 0.99 |  |
|  | AGT | 0.54 |  | Arginine | CGT | 0.68 | AGA |
|  | AGC | 0.55 |  |  | CGC | 0.69 |  |
| Proline | CCT | 1.38 | CCT |  | CGA | 0.51 |  |
|  | CCC | 0.92 |  |  | CGG | 0.62 |  |
|  | CCA | 1.17 |  |  | AGA | 1.95 |  |
|  | CCG | 0.51 |  |  | AGG | 1.52 |  |
| Threonine | ACT | 1.55 | ACT | Glycine | GGT | 0.74 | GGA |
|  | ACC | 1.15 |  |  | GGA | 1.75 |  |
|  | ACA | 0.85 |  |  | GGG | 0.77 |  |
|  | ACG | 0.39 |  |  | GGC | 0.70 |  |
| Alanine | GCT | 1.54 | GCT |  |  |  |  |

**S3: Similar codon usage patterns of hepadnaviridae and its hosts**

| **Sl. no.** | **Hepadnaviridae genomes** | **Hosts** | **More frequently used codons** | **Less frequently used codons** | **Overrepresented codons** | **Underrepresented codons** |
| --- | --- | --- | --- | --- | --- | --- |
| 1 | Sheldgoose hepatitis B virus | *Chloephaga melanoptera* | TCC, TGC, AGG, GTC, GCT | TCG, AGT, CTA, CTT, TGT, CCG, CGA, CGG, ATA, ACA, ACG, GTA, GCG, GGG | AGG | TCG, CTA, TGT, CCG, CGA, GCG, GGG |
| 2 | Duck hepatitis B virus | *Anas platyrhynchos* | TCC, CTC, TGC, CCA, AGA, AGG, GTC, GCC, GCT | TCG, AGT, TTG, CTA, CTT, TGT, CCG, CGA, CGG, CGT, ACA, ACG, GTT, GCG | None | TCG, CCG, CGT, GCG |
| 3 | Roundleaf bat hepatitis B virus isolate RBHBV_GB09-256_Hip_rub_GAB_2009 | *Hipposideros armiger* | TCC, TCT, CTC, TAC, TGC, CCC, CCT, CAC, CGC, AGA, ATC, ACC, ACT, GTC, GCC, GAC, GGA | AGT, TTA, TTG, CTA, CTT, TAT, TGT, CCA, CCG, CAT, CGA, CGT, ATA, ACG, GTA, GCA, GCG, GAT, GGG, GGT | ACC | CCG, AGC, GTA |
| 4 | Long-fingered bat hepatitis B virus isolate 776 | *Miniopterus fuliginosus* | TCC, CTC, CTG, CCC, CGC, CGG, AGA, AGG, ATT, ACC, AAC, GTC, GCC, GCT, GGG | TCG, AGT, CTA, TGT, CCA, CCG, CGA, ATA, ACG, AAT, GTA, GCA, GCG, GGT | TCC, ACC | TCG, AGT, CTA, ACG |
| 5 | Woolly monkey hepatitis B virus clone WMHBV-2 | *Lagothrix lagotricha* | TCC, TTC, CTG, CCC, CCT, CAC, AGA, AGG, ATC, ACC, GTG, GCC, GCT, GAC | TCG, AGT, TTT, TTA, CTA, CTT, TAT, TGT, CCG, CAT, CGA, CGG, CGT, ATA, ATT, ACA, ACG, GTA, GTC, GCG, GAT, GAA, GGT | CTG, AGG | TCG, CTA, CCG, CGA, ATA, ACG, GTA, GCG |
| 6 | Woodchuck hepatitis virus | *Marmota monax* | CTG, CCC, CCT, AGA, AGG, ACC, ACT, GTG, GCC, GCT, GAC , GAG | TCG, AGT, CTA, CCG, CGA, CGG, CGT, ATA, ACA, ACG, GTA, GCA, GCG, GAA | None | CTA, CCG, CGA, ACG, GCG |
| 7 | Hepatitis B virus (strain ayw) | *Homo sapiens* | TCC, TCT, CTC, CCT, AGA, ACC, ACT, GTG, GCC, GCT, GAC, GGA, GGG | TCG, AGT, TTT, TTA, CTA, CTT, TAT, CCG, CAT, CGT, ATA, ACG, AAT, AAA, GTA, GTC, GTT, GCA, GCG, GAT, GAA, GGT | None | TCG, CCG, CGT, ACG, GCG |
| 8 | White sucker hepadnavirus isolate RR173 | *Catostomus commersonii* | TCT, CTG, CTT, CCT, AGA, ATT, ACA, AAC, GTT, GCA, GCT, GGA | TCA, TCG, AGT, TTA, CTC, CCG, CGA, CGG, ACG, AAT, GTA, GTC, GCG | None | TCG, CCG, CGA, ACG, GCG |

**S4: Average minimum free energy value for each genome in hepadnaviridae**

| **Sl. no.** | **Genomes** | **mFE value (Kcal/mol)** |
| --- | --- | --- |
| 1 | Woodchuck hepatitis virus | -218.75 |
| 2 | Ground squirrel hepatitis virus | -298.74 |
| 3 | Duck hepatitis B virus | -238.57 |
| 4 | Long-fingered bat hepatitis B virus isolate 776 | -238.48 |
| 5 | Tinamou hepatitis B virus isolate 160050 | -239.65 |
| 6 | Tibetan frog hepadnavirus isolate 243398 | -376.54 |
| 7 | Woolly monkey hepatitis B virus clone WMHBV-2 | -407.70 |
| 8 | White sucker hepadnavirus isolate RR173 | -150.78 |
| 9 | Tent-making bat hepatitis B virus isolate TBHBV_Pan372_Uro_bil_PAN_2010 | -474.55 |
| 10 | Horseshoe bat hepatitis B virus isolate HBHBV_GB09-403_Rhi_alc_GAB_2009 | -576.79 |
| 11 | Roundleaf bat hepatitis B virus isolate RBHBV_GB09-256_Hip_rub_GAB_2009 | -572.56 |
| 12 | Parrot hepatitis B virus | -239.65 |
| 13 | Snow goose hepatitis B virus | -238.57 |
| 14 | Ross's goose hepatitis B virus | -238.57 |
| 15 | Sheldgoose hepatitis B virus | -238.57 |
| 16 | Heron hepatitis B virus | -236.40 |
| 17 | Hepatitis B virus (strain ayw) | -354.29 |

**S5: Average mRNA stability index for each genome in hepadnaviridae**

| **Sl. no.** | **Genomes** | Average mRNA stability index |
| --- | --- | --- |
| 1 | Woodchuck hepatitis virus | -0.08 |
| 2 | Ground squirrel hepatitis virus | 0.02 |
| 3 | Duck hepatitis B virus | 0.03 |
| 4 | Long-fingered bat hepatitis B virus isolate 776 | -0.01 |
| 5 | Tinamou hepatitis B virus isolate 160050 | -0.02 |
| 6 | Tibetan frog hepadnavirus isolate 243398 | 0.02 |
| 7 | Woolly monkey hepatitis B virus clone WMHBV-2 | -0.01 |
| 8 | White sucker hepadnavirus isolate RR173 | -0.03 |
| 9 | Tent-making bat hepatitis B virus isolate TBHBV_Pan372_Uro_bil_PAN_2010 | -0.01 |
| 10 | Horseshoe bat hepatitis B virus isolate HBHBV_GB09-403_Rhi_alc_GAB_2009 | -0.09 |
| 11 | Roundleaf bat hepatitis B virus isolate RBHBV_GB09-256_Hip_rub_GAB_2009 | -0.02 |
| 12 | Parrot hepatitis B virus | 0.01 |
| 13 | Snow goose hepatitis B virus | 0.01 |
| 14 | Ross's goose hepatitis B virus | 0.07 |
| 15 | Sheldgoose hepatitis B virus | 0.04 |
| 16 | Heron hepatitis B virus | 0.00 |
| 17 | Hepatitis B virus (strain ayw) | -0.03 |
